# Supplementary material for: Selective recovery of light olefins from polyolefin catalyzed by Lewis acidic Sn-Beta zeolites without Brønsted acidity
Source: Royal Society of Chemistry journal article supplement (doi:10.1039/d4cy00317a), 2024-01-01
Supplement: d4cy00317a1.pdf [file d4cy00317a1.pdf]

## Supplementary Information

# Selective recovery of light olefins from polyolefin catalyzed by Lewis acidic Sn-Beta zeolites without Brønsted acidity

Shinya Kokuryo<sup>\*a</sup>, Kazuya Tamura<sup>a</sup>, Soshi Tsubota<sup>a</sup>, Koji Miyake<sup>\*a,b</sup>, Yoshiaki Uchida<sup>a</sup>, Atsushi Mizusawa<sup>c</sup>, Tadashi Kubo<sup>c</sup>, and Norikazu Nishiyama<sup>a,b</sup>

<sup>a</sup>*Division of Chemical Engineering, Graduate School of Engineering Science, Osaka University, 1-3 Machikaneyama, Toyonaka, Osaka 560-8531, Japan.*

<sup>b</sup>*Innovative Catalysis Science Division, Institute for Open and Transdisciplinary Research Initiatives (ICS-OTRI), Osaka University, Suita, Osaka 565-0871, Japan*

<sup>c</sup>*AC Biode Co., Ltd. 498-6 Iwakura Hanazono, Sakyo, Kyoto, 606-0024, Japan*

*E-mail: [skokuryo@cheng.es.osaka-u.ac.jp](mailto:skokuryo@cheng.es.osaka-u.ac.jp), [kojimiya@cheng.es.osaka-u.ac.jp](mailto:kojimiya@cheng.es.osaka-u.ac.jp)*

## Supplementary figures

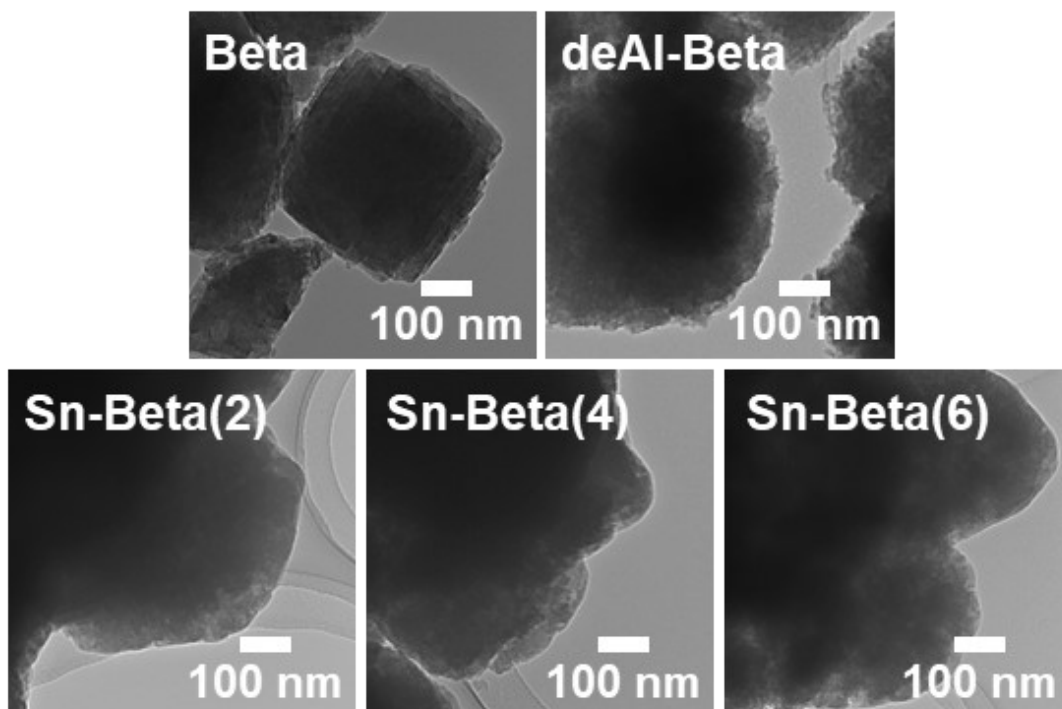

**Fig. S1** TEM images of Beta, deAl-Beta, and Sn-Beta( $x$ ).

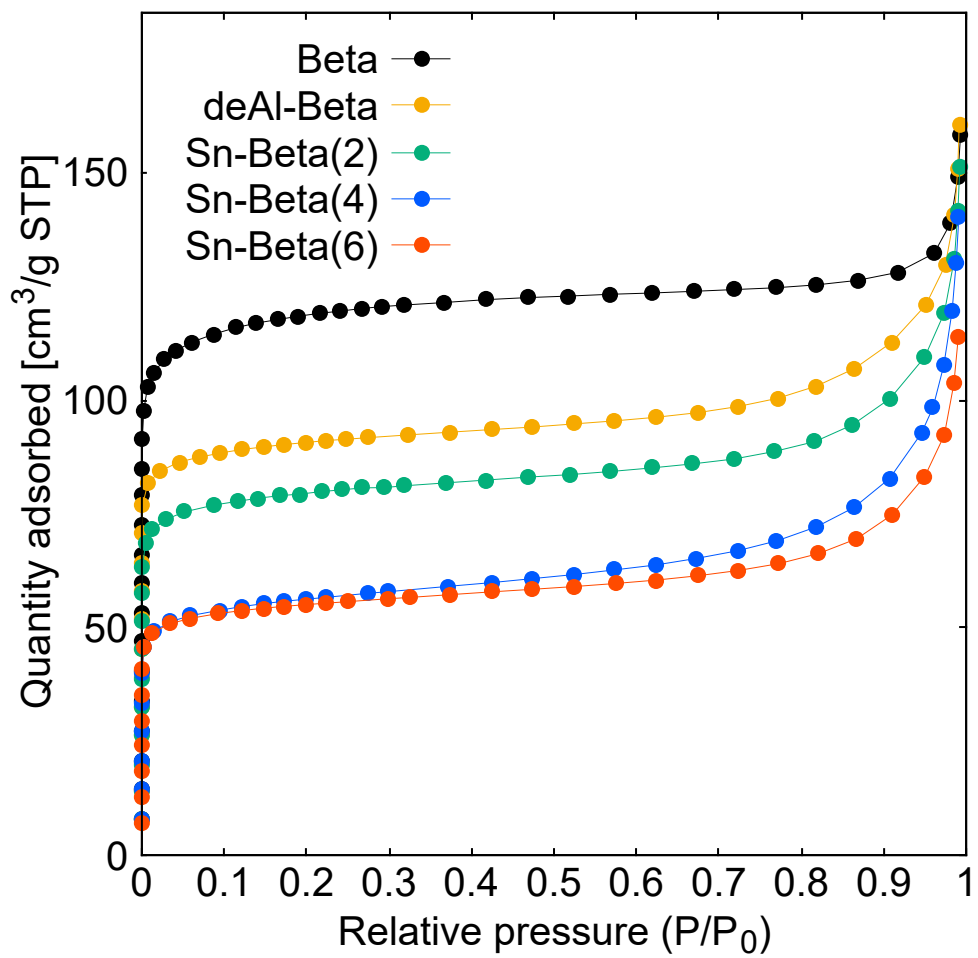

**Fig. S2** Nitrogen adsorption isotherms of Beta, deAl-Beta, and Sn-Beta(*x*).

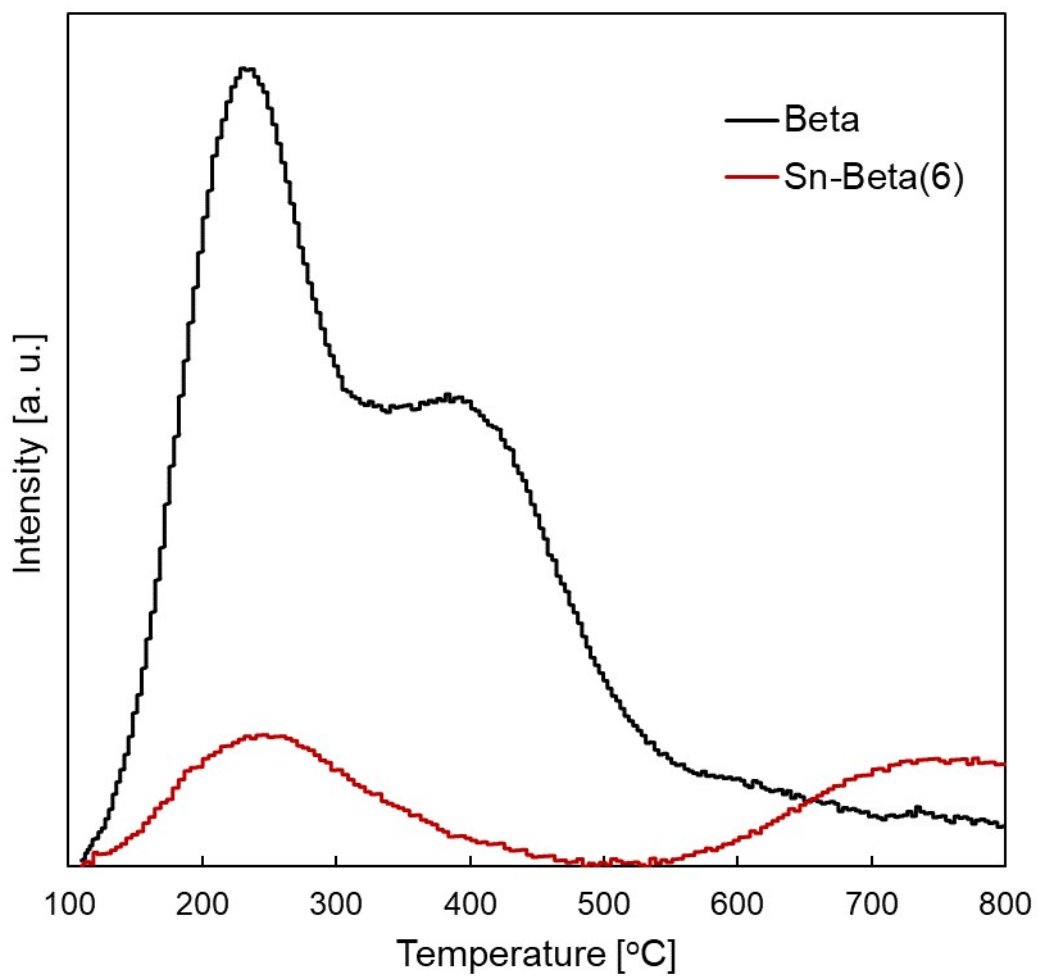

**Fig. S3** NH<sub>3</sub>-TPD profiles of Beta and Sn-Beta(6).

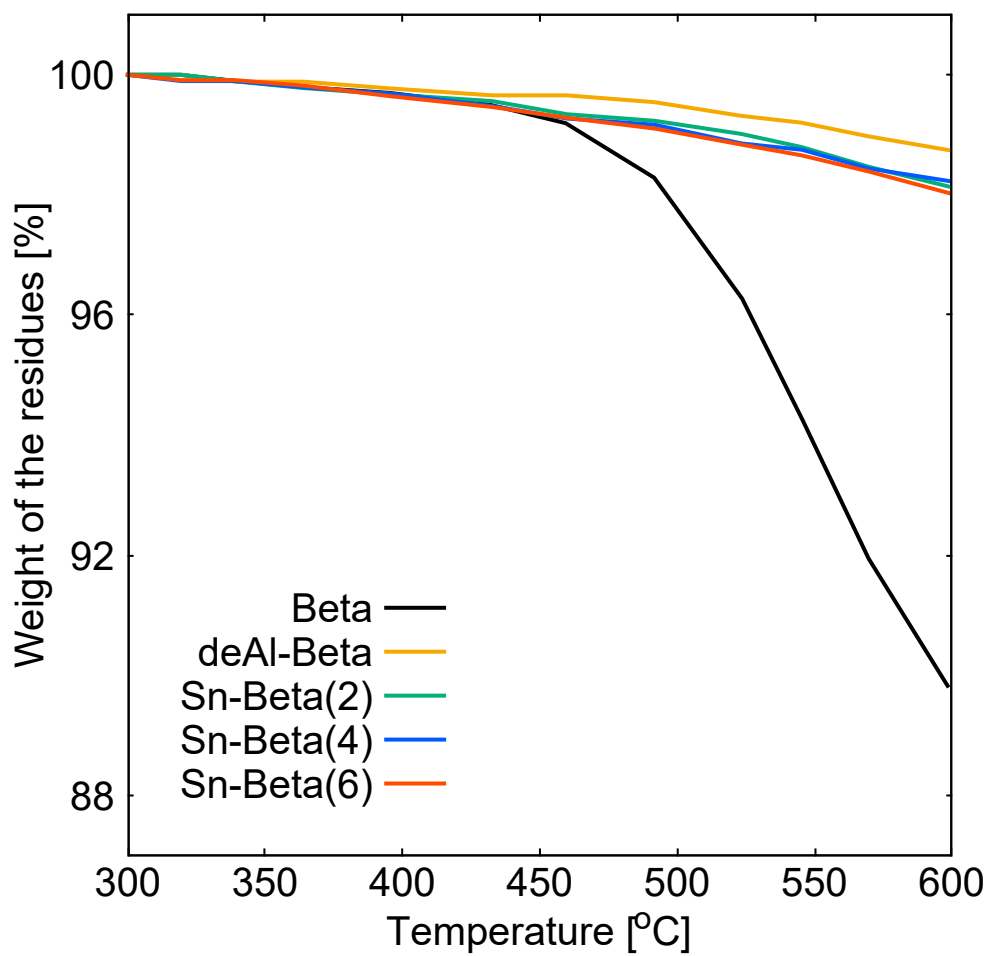

**Fig. S4** TG curves of coke combustion in air after LDPE cracking over Beta, deAl-Beta, and Sn-Beta( $x$ ).

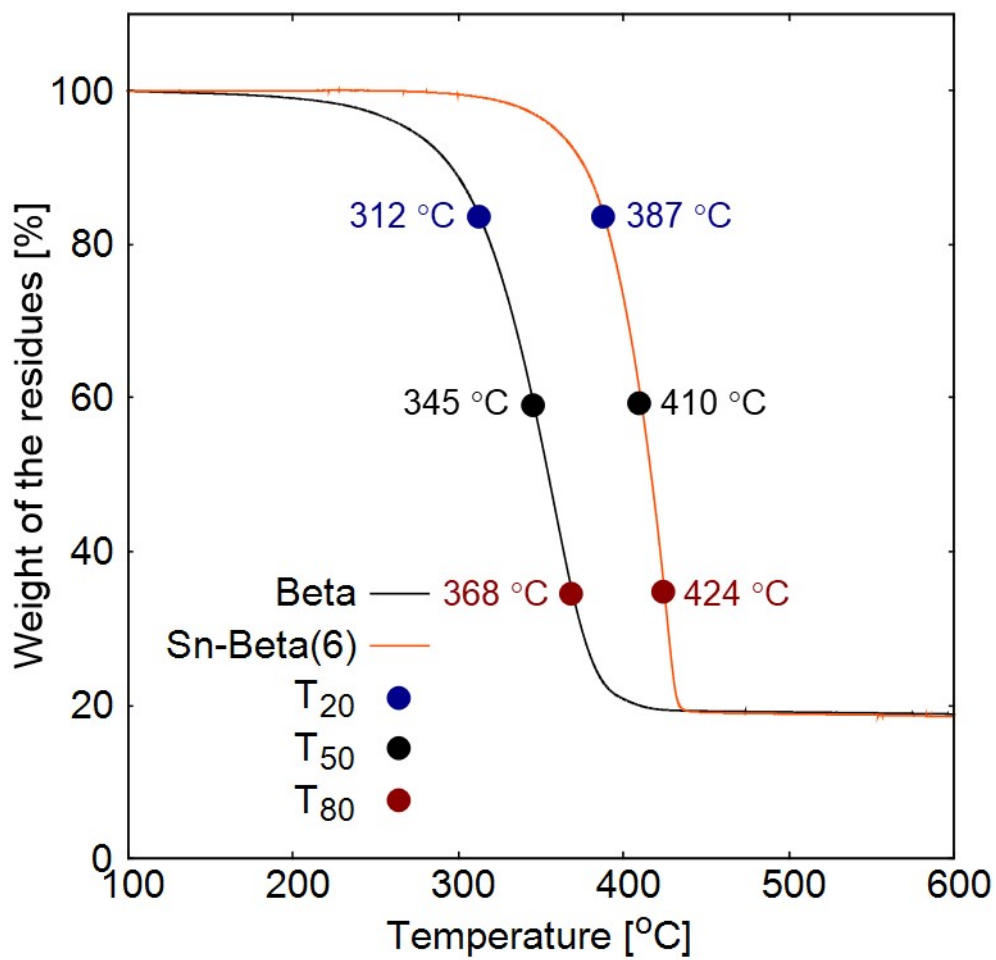

**Fig. S5** The definition of  $T_y$  of Beta and Sn-Beta(6).
